# Supplementary material
Source: HighWire-hosted journal article supplement (https://bmjopen.bmj.com/content/15/5/e100058)
Supplement: inline-supplementary-material-1 [file inline-supplementary-material-1.pdf]

Supplementary Data. Definition and explanation for Image quality assessment categories

| Category                        | Explanation                                                                                                                                                                                    | 0                       | 1                            | 2                     | 3                      | 4                  |
|---------------------------------|------------------------------------------------------------------------------------------------------------------------------------------------------------------------------------------------|-------------------------|------------------------------|-----------------------|------------------------|--------------------|
| Field of View                   | Considering the ideally captured area in a single UWF fundus photograph, estimate the percentage of the retinal area shown in the current image (even if only limited assessment is possible). | <50%                    | 50~66%                       | 66%~75%               | 75%~90%                | >90%               |
| Details of Posterior Pole       | Optic Disc/Macula Visualization                                                                                                                                                                | Completely unassessable | Very limited assessment only | Moderately assessable | Fairly well assessable | Fully assessable   |
| Peripheral Retina Visualization | Within the visible range of the peripheral retina                                                                                                                                              | Completely unassessable | Very limited assessment only | Moderately assessable | Fairly well assessable | Fully assessable   |
| Centering of Image              | How well the image is centered                                                                                                                                                                 | Not centered at all     | Poorly centered              | Moderately centered   | Fairly well centered   | Perfectly centered |
| Final Grading                   | Overall grading of the image                                                                                                                                                                   | Completely unassessable | Very limited assessment only | Moderately assessable | Fairly well assessable | Fully assessable   |
